# Supplementary material
Source: PubMed Central journal article supplement (PMC5777207)
Supplement: 2017_176719-Disclosures_and_Contributions.pdf [file 2017_176719-Disclosures_and_Contributions.pdf]

Haematologica  
HAEMATOL/2017/176719  
Version 3

Single-molecule DNA sequencing of acute myeloid leukemia and  
myelodysplastic syndromes with multiple TP53 alterations

Laurence Lodé, Adam Ameur, Thibault Coste, Audrey Ménard, Steven  
Richebourg, Jean Baptiste Gaillard, Yannick Le Bris, Marie Christine  
Béné, Thierry Lavabre-Bertrand, and Thierry Soussi

Disclosures: The authors declare no competing financial interests.

Contributions: T.S. and L.L. designed the research; T.C., A.M., S.R., J.B.G., Y.L., M.C.B.  
and T.L.B. were actively involved in patient care or routine diagnostic procedures; A.A.  
performed the SMRT sequence and bioinformatics analysis; all authors reviewed and  
approved the manuscript
